## Conclusions

A novel analysis for the dynamic force response of squeeze film dampers with a central groove is introduced. The analysis considers with some detail the dynamic flow interaction between the squeeze film lands and the feeding groove. For small amplitude centered motions and based on the short bearing assumption, the model determines corrected values for the damping and inertia force coefficients which reflect the importance of the groove volume—fluid compressibility effect on the dynamic force response of SFDs.

Correlations with experimental measurements available in the literature show the accuracy of the present analysis. The comparisons presented show that the grooved-damper behaves at low frequencies as a single land damper of effective length equal to the sum of the land lengths and groove width. The novel analytical formulation resolves theoretically the long suspected effect of a central groove in a SFD and, it also brings to attention that current considerations used in actual damper design and operation may be incorrect.

Dynamic force coefficients are shown to be frequency dependent. Predictions show that the combined action of fluid inertia and groove volume—liquid compressibility affects the force coefficients for dynamic excitation at large frequencies.

## Acknowledgments

The generous support of the Texas A&M Turbomachinery Consortium is gratefully acknowledged. Thanks also to Professor K. Rouch for providing some information on his test damper configuration and operating conditions.

## References

- Brennen, C., 1976, "On the Flow in an Annulus Surrounding a Whirling Cylinder," *Journal of Fluid Mechanics*, Vol. 75, pp. 173–191.
- Feder, E., Bansal, P. N., and Blanco, A., 1978, "Investigation of Squeeze Film Damper Forces Produced by Circular Centered Orbits," *ASME Journal of Engineering for Power*, Vol. 100, pp. 15–21.
- Happel, J., and Brenner, H., 1965, *Low Reynolds Number Hydrodynamics*, Prentice Hall, Englewood Cliffs, NJ, pp. 52–55.
- Holmes, R., and Sykes, J., 1990, "The Effects of Manufacturing Tolerances

on the Vibration of Aero-Engine Rotor-Damper Assemblies," 6th Workshop on Rotor-Dynamic Instability Problems in High-Performance Turbomachinery, Texas A&M University, College Station, TX, May 21–23.

Jung, S. Y., San Andres, L., and Vance, J. M., 1990, "Measurements of Pressure Distribution and Force Coefficients in a Squeeze Film Damper, Part I: Fully Open Ended Configuration, II: Partially Sealed Configuration," accepted for presentation at the 1990 ASME-STLE Tribology Conference, Toronto, Canada, STLE 90-TC-1E1, 90-TC-1E2.

Mulcahy, T. M., 1980, "Fluid Forces on Rods Vibrating in Finite Length Annular Regions," *ASME Journal of Applied Mechanics*, Vol. 47, 1980, pp. 234–240.

Ramli, M. D., Roberts, J. B., and Ellis, J., 1987, "The Determination of Squeeze Film Dynamic Coefficients from Experimental Transient Data," *ASME JOURNAL OF TRIBOLOGY*, Vol. 109, No. 1, pp. 155–163.

Rhode, S. M., and Ezzat, H. A., 1976, "On the Dynamic Behavior of Hybrid Journal Bearings," *ASME JOURNAL OF LUBRICATION TECHNOLOGY*, pp. 557–575.

Roberts, J. B., Holmes, R., and Mason, P. J., 1986, "Estimation of Squeeze Film Damping and Inertial Coefficients from Experimental Free-Decay Data," *Proc. of the Instn. of Mechanical Engineers*, Vol. 200, 2C, pp. 123–133.

Roberts, J. B., and Ellis, J., 1989, "The Determination of Squeeze Film Dynamic Coefficients from Transient Two Dimensional Experimental Data," ASME-STLE Joint Tribology Conference, October, Fort Lauderdale, FLA.

Rouch, K. E., 1990, "Experimental Evaluation of Squeeze Film Damper Coefficients with Frequency Domain Techniques," *STLE Tribology Transactions*, Vol. 33, No. 1, pp. 67–75.

San Andres, L., and Vance, J. M., 1986, "Effects of Fluid Inertia and Turbulence on the Force Coefficients for Squeeze Film Dampers," *ASME Journal of Engineering for Gas Turbines and Power*, Vol. 108, pp. 332–339.

San Andres, L., and Vance, J. M., 1987a, "Experimental Measurement of the Dynamic Pressure Distribution in a Squeeze Film Damper Executing Circular Centered Motions," *ASLE Transactions*, Vol. 30, No. 3, pp. 373–383.

San Andres, L., and Vance, J. M., 1987b, "Effect of Fluid Inertia on Squeeze Film Damper Forces for Small Amplitude Circular Centered Motions," *ASLE Transactions*, Vol. 30, No. 1, pp. 69–76.

San Andres, L., 1990, "Fluid Compressibility Effects on the Dynamic Response of Hydrostatic Journal Bearings," 6th Workshop on Rotor Dynamic Instability Problems in High-Performance Turbomachinery, Texas A&M University, College Station, TX, May 21–23.

Smith, D. M., 1964–1965, "Journal Bearing Dynamic Characteristics—Effect of Inertia of Lubricant," *Proc. Inst. Mech. Engrs.*, Vol. 179, Part 3J, pp. 37–44.

Tichy, J. A., 1982, "Effects of Fluid Inertia and Viscoelasticity on Squeeze Film Bearing Forces," *ASLE Transactions*, Vol. 25, pp. 125–132.

Tichy, J. A., 1984, "Measurements of Squeeze Film Bearing Forces to Demonstrate the Effect of Fluid Inertia," ASME Paper 84-GT-11.

Zeidan, F., 1989, "Cavitation Effects on the Performance of Squeeze Film Damper Bearings," Ph.D. dissertation, Mechanical Engineering Dept., Texas A&M University.

## DISCUSSION

### R. J. Rogers<sup>1</sup> and Y. Hu<sup>1</sup>

The author provides an interesting well-written paper with an explanation for the differences between the large experimentally observed values of damping and inertia and those predicted by conventional short-bearing squeeze-film theory. A formulation allowing for fluid compressibility in the central groove is derived and apparently gives good results.

There may be a typographical error in Eq. (19) as the discussers were unable to reproduce the calculated value for  $M_{rr}$  in Table 1. An indirect approach was used since the oscillation frequency  $\omega$  and compressibility  $\beta$  were not stated. It was also found that with II values close to unity,  $M_{rr}$  becomes negative. The author's comments on this would be of interest.

In comparing the results with Ramli et al. (1987) it is not clear how the experimental values in Table 1 were obtained

and for what frequency. It is also noted that Ramli et al. (1987) report a groove depth  $H_g = 0.5$  mm rather than 5 mm. This may make a difference to the inertia coefficient from Eq. (19).

### Author's Closure

The author thanks the reviewers for their kind compliments on the present analysis. In reference to the reviewer's comments I note that:

- The typographical error in Eq. (19) has been corrected on the final revised form of the paper.

- The experimental results of Ramli et al. (1987) refer to a damper with a groove depth equal to 0.5 mm. This typographical error is also corrected on the final version of the paper.

- In the experimental results of Ramli et al. (1987), the groove depth is so small ( $H_g/c = 2.0$ ) that the damper acts effectively as a single land damper with equivalent length equal to the sum of land lengths and groove axial length. For the calculations, a light oil with a bulk modulus equal to 1.72 GPa (250 Kpsi) was used. The force coefficients were evaluated at fre-

<sup>1</sup>Department of Mechanical Engineering, University of New Brunswick, Fredericton, Canada.
